# Supplementary material for: Microstructure and surface property of macroscopic gradient polymer initiated by polysiloxane benzophenone photoinitiators with different silicone chain lengths
Source: Royal Society of Chemistry journal article supplement (doi:10.1039/c2jm30270e), 2012-01-01
Supplement: c2jm30270e.pdf [file c2jm30270e.pdf]

**Table S1.** The contact angle and the dispersion surface energy ( $\gamma_s^d$ ) of the gradient polymer film (PTPGDA) initiated by HBP-Si-B/C

| Team                                   | $\theta$ (H <sub>2</sub> O)/ <sup>o</sup> | $\gamma_s^d$ (H <sub>2</sub> O)/ (mN/m) |
|----------------------------------------|-------------------------------------------|-----------------------------------------|
| HBP-Si-B ( $1.0 \times 10^{-3}$ mol/L) | 72.96                                     | 92.43                                   |
| HBP-Si-B ( $4.0 \times 10^{-3}$ mol/L) | 79.91                                     | 76.35                                   |
| HBP-Si-B ( $8.0 \times 10^{-3}$ mol/L) | 87.86                                     | 59.49                                   |
| HBP-Si-B ( $2.5 \times 10^{-2}$ mol/L) | 96.24                                     | 43.92                                   |
| HBP-Si-C ( $1.0 \times 10^{-3}$ mol/L) | 74.32                                     | 89.21                                   |
| HBP-Si-C ( $4.0 \times 10^{-3}$ mol/L) | 82.67                                     | 70.29                                   |
| HBP-Si-C ( $8.0 \times 10^{-3}$ mol/L) | 90.03                                     | 55.23                                   |
| HBP-Si-C ( $2.5 \times 10^{-2}$ mol/L) | 99.69                                     | 38.24                                   |

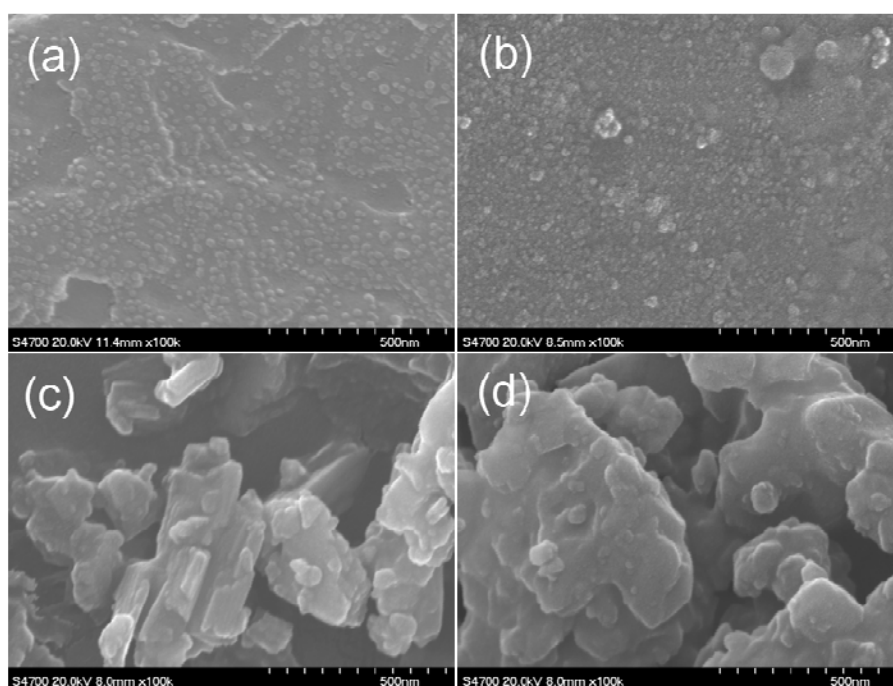

**Fig. S1** SEM images of the polymer films (PTPGDA) initiated by different concentration of HBP-Si-B ((a)  $1.0 \times 10^{-3}$  mol/L (b)  $4.0 \times 10^{-3}$  mol/L (c)  $8.0 \times 10^{-3}$  mol/L (d)  $2.5 \times 10^{-2}$  mol/L) and TEOA ( $3.3 \times 10^{-2}$  mol/L)

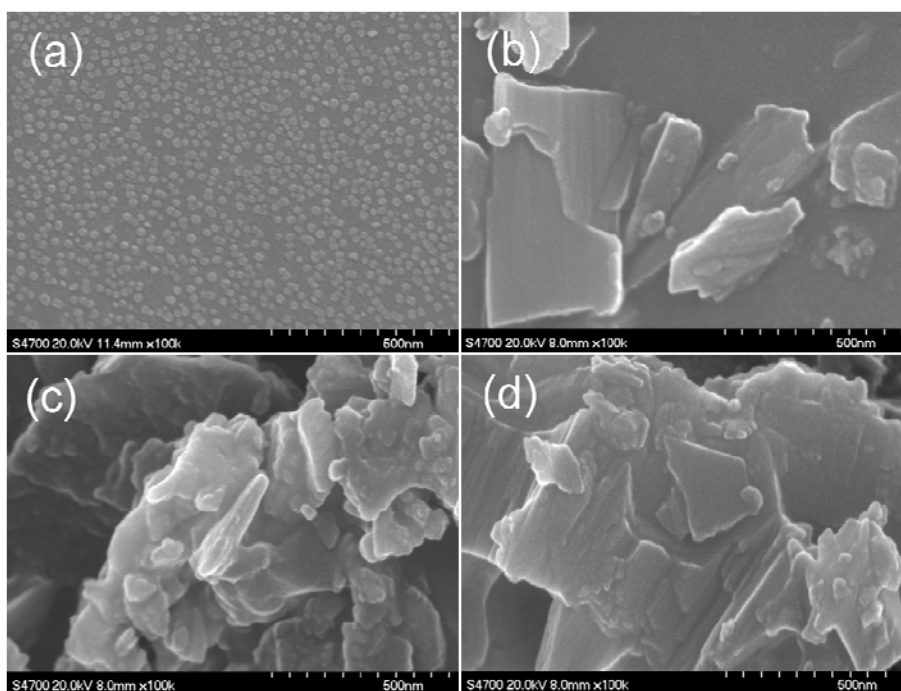

**Fig. S2** SEM images of the polymer films (PTPGDA) initiated by different concentration of HBP-Si-C ((a)  $1.0 \times 10^{-3}$  mol/L (b)  $4.0 \times 10^{-3}$  mol/L (c)  $8.0 \times 10^{-3}$  mol/L (d)  $2.5 \times 10^{-2}$  mol/L) and TEOA ( $3.3 \times 10^{-2}$  mol/L)
